# Supplementary material
Source: PubMed Central journal article supplement (PMC6925667)
Supplement: pluvinage_et_al_supplementary_revised_cwz069.pdf [file pluvinage_et_al_supplementary_revised_cwz069.pdf]

**Structural and functional analysis of four  
family 84 glycoside hydrolases from the  
opportunistic pathogen *Clostridium perfringens***

Benjamin Pluinage<sup>a</sup>, Patricia M. Massel<sup>a</sup>, Kristyn Burak<sup>a</sup>, Alisdair B. Boraston<sup>a</sup>

**Supplementary Data**

Table SI: CpGH84 catalytic modules sequence identity

|         | CpGH84A | CpGH84B | CpGH84C | CpGH84D |
|---------|---------|---------|---------|---------|
| CpGH84A |         | 26      | 24      | 44      |
| CpGH84B | 26      |         | 58      | 34      |
| CpGH84C | 24      | 58      |         | 31      |
| CpGH84D | 44      | 34      | 31      |         |

Table SII: Primer sequences used to clone CpGH84s catalytic modules (*NheI* and *XhoI* restriction sites are underlined).

| Primer        | Sequence                                           |
|---------------|----------------------------------------------------|
| GH84A Forward | GAT CAA <u>GCT AGC</u> ACA GAT GGT ATT ACA G       |
| GH84A Reverse | CAT ATG <u>CTC GAG</u> TTA ATC AAC AAT AGA GCC     |
| GH84B Forward | GAT CAA <u>GCT AGC</u> GAT GAG GGA TTA AAA AAT     |
| GH84B Reverse | CAT ATG <u>CTC GAG</u> TTA TTC ATG GAC TTT TCT TAT |
| GH84D Forward | GAT CAA <u>GCT AGC</u> AAT GGC AGC AAA GAA ACA     |
| GH84D Reverse | CAT ATG <u>CTC GAG</u> TTA ATT ATC TCC TAT GAT TTT |

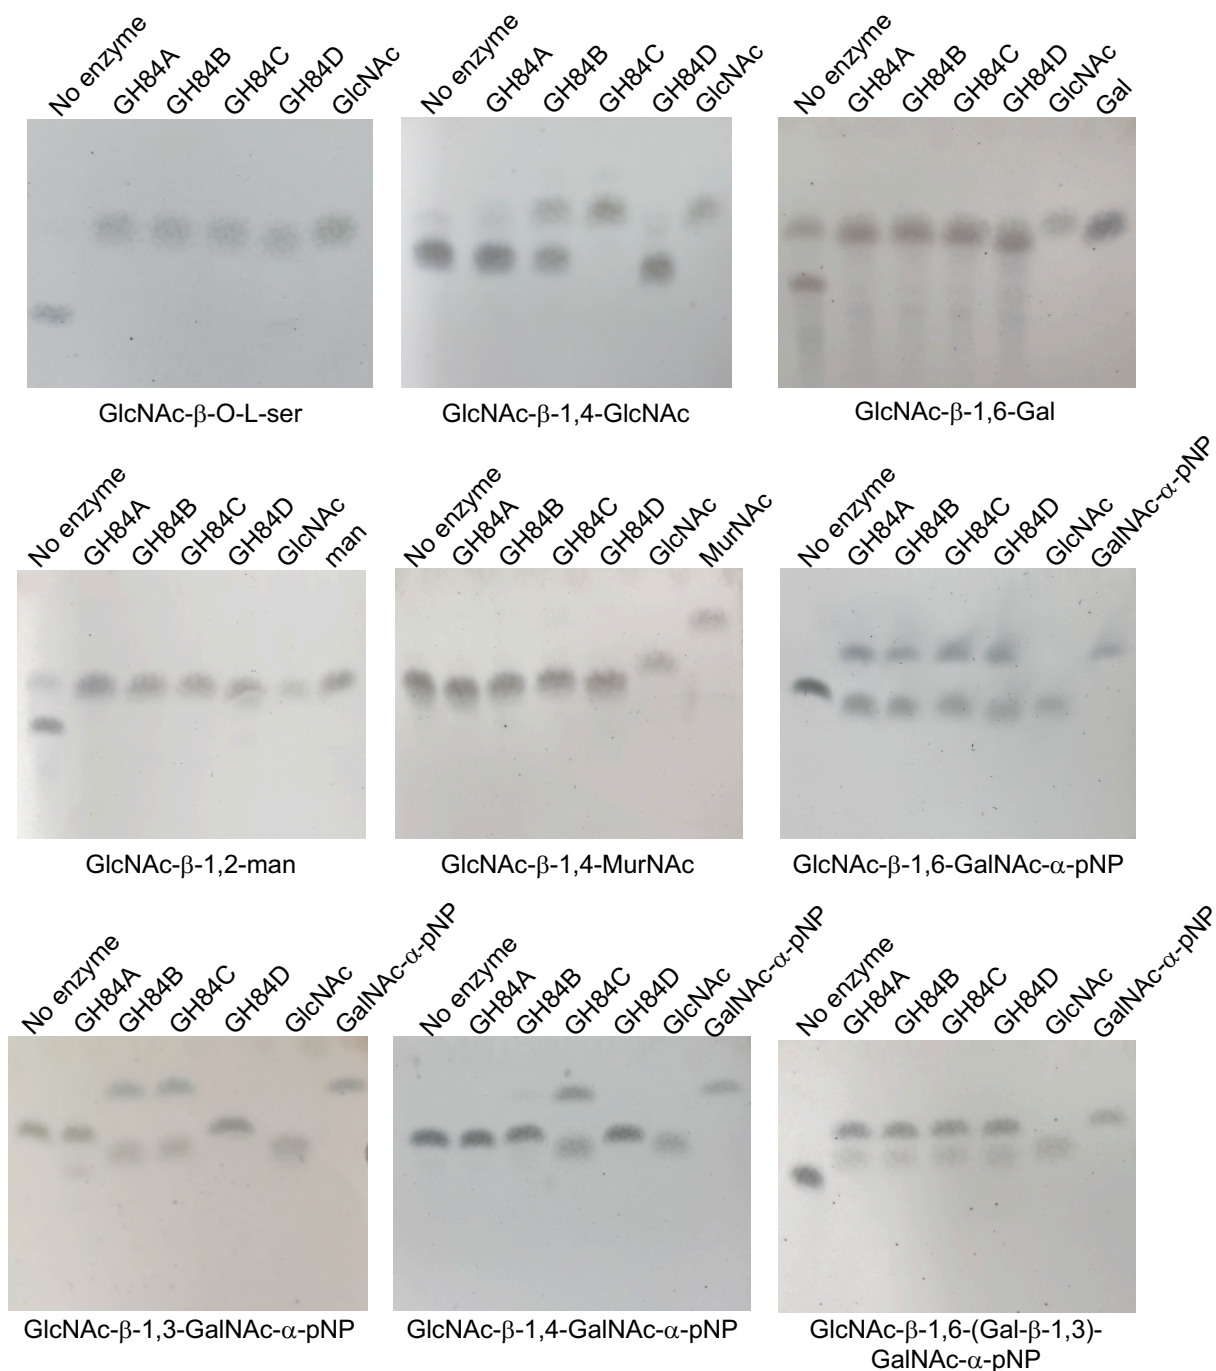

Figure S1: Thin layer chromatography (TLC) analysis of CpGH84s substrate specificities. The substrate tested is indicated below each TLC. GlcNAc: N-acetyl-glucosamine, Gal: galactose, Man: mannose, MurNAc: N-acetylmuramic acid and GalNAc-α-pNP: *para*-nitrophenol-N-acetyl-galactosamine.

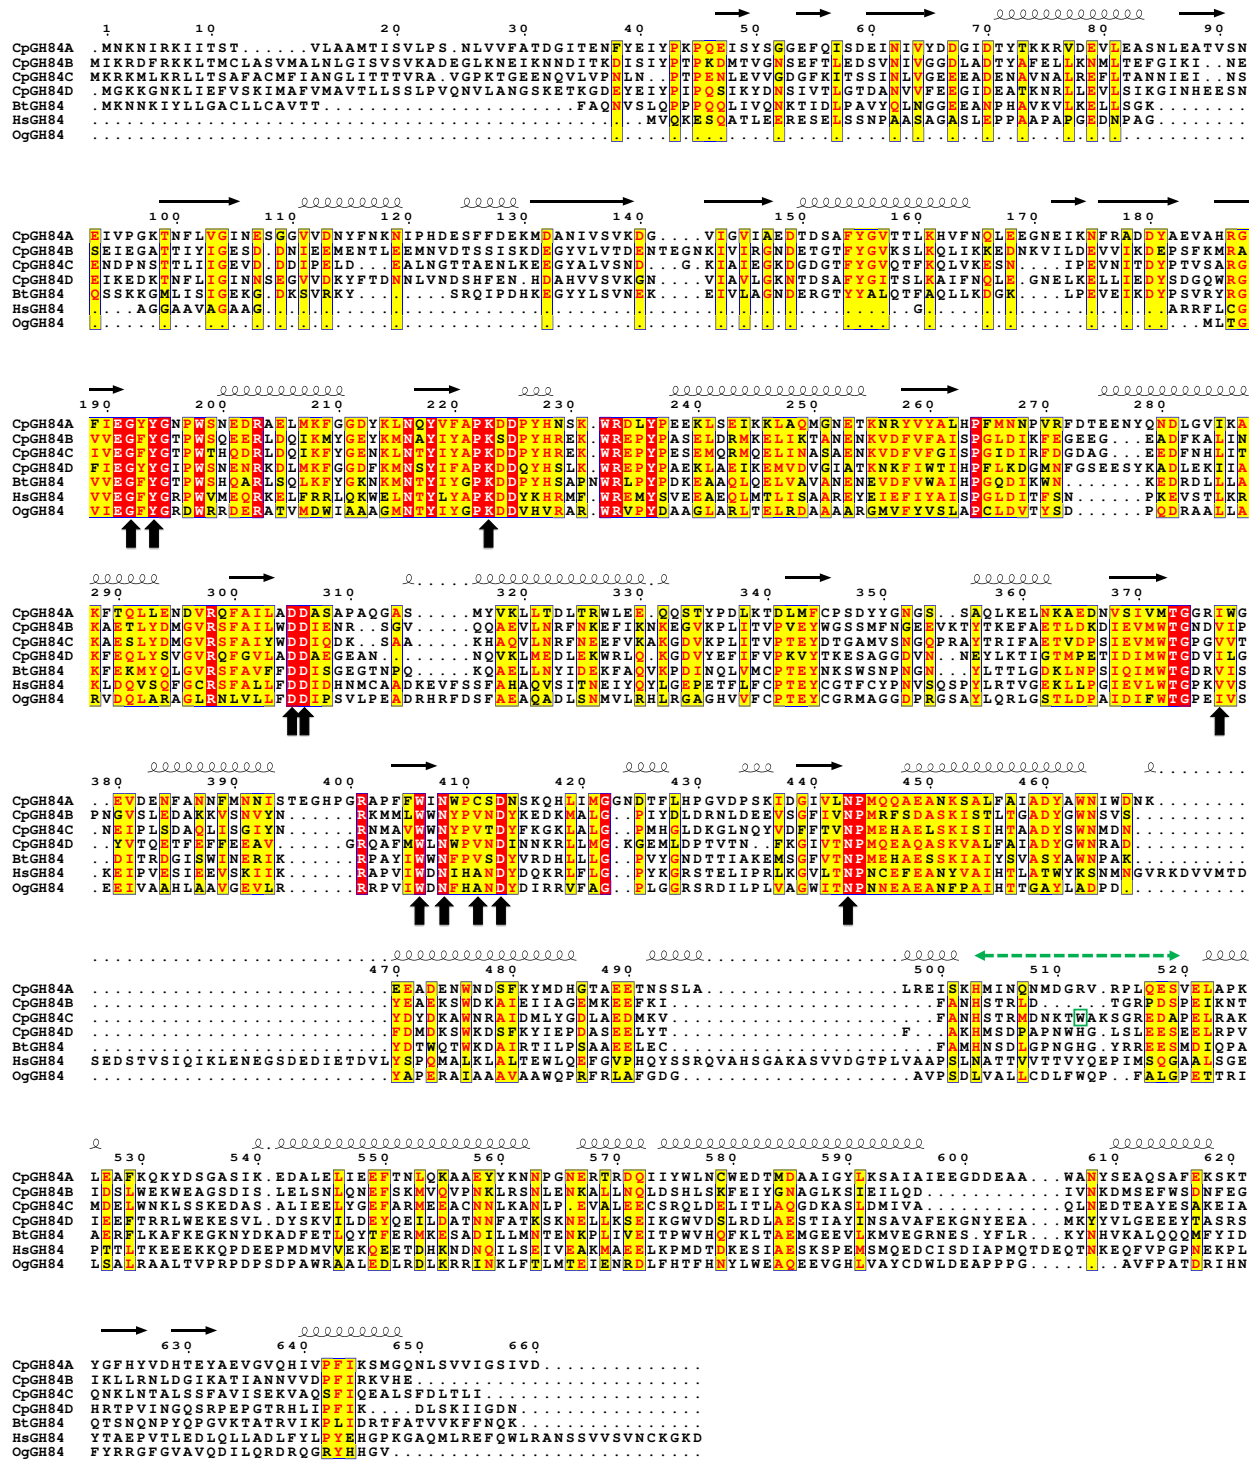

Figure S2: Sequence alignment of the catalytic modules of family 84 glycoside hydrolases. *CpGH84A*, *CpGH84B*, *CpGH84C* and *CpGH84D* catalytic modules from *C. perfringens* are aligned with the catalytic modules of *Bacteroides thetaiotaomicron* GH84 (*BtGH84*), human O-glcNAcase (*HsGH84*) and *Oceanicola granulosus* GH84 (*OgGH84*). Red indicates identical residues. Yellow indicates strong similarity. Conserved residues forming the catalytic pocket are marked with black arrows.

catalytic residues are indicated by black arrows and stars, respectively. Numbering indicated corresponds to the amino acid sequence of *CpGH84A*. The green dashed double arrow indicates the loop from *CpGH84C* carrying W490 (highlighted by a green box) at its apex. Alignment was generated using ESPript - <http://esprict.ibcp.fr> (Robert, X. and Gouet, P. 2014).

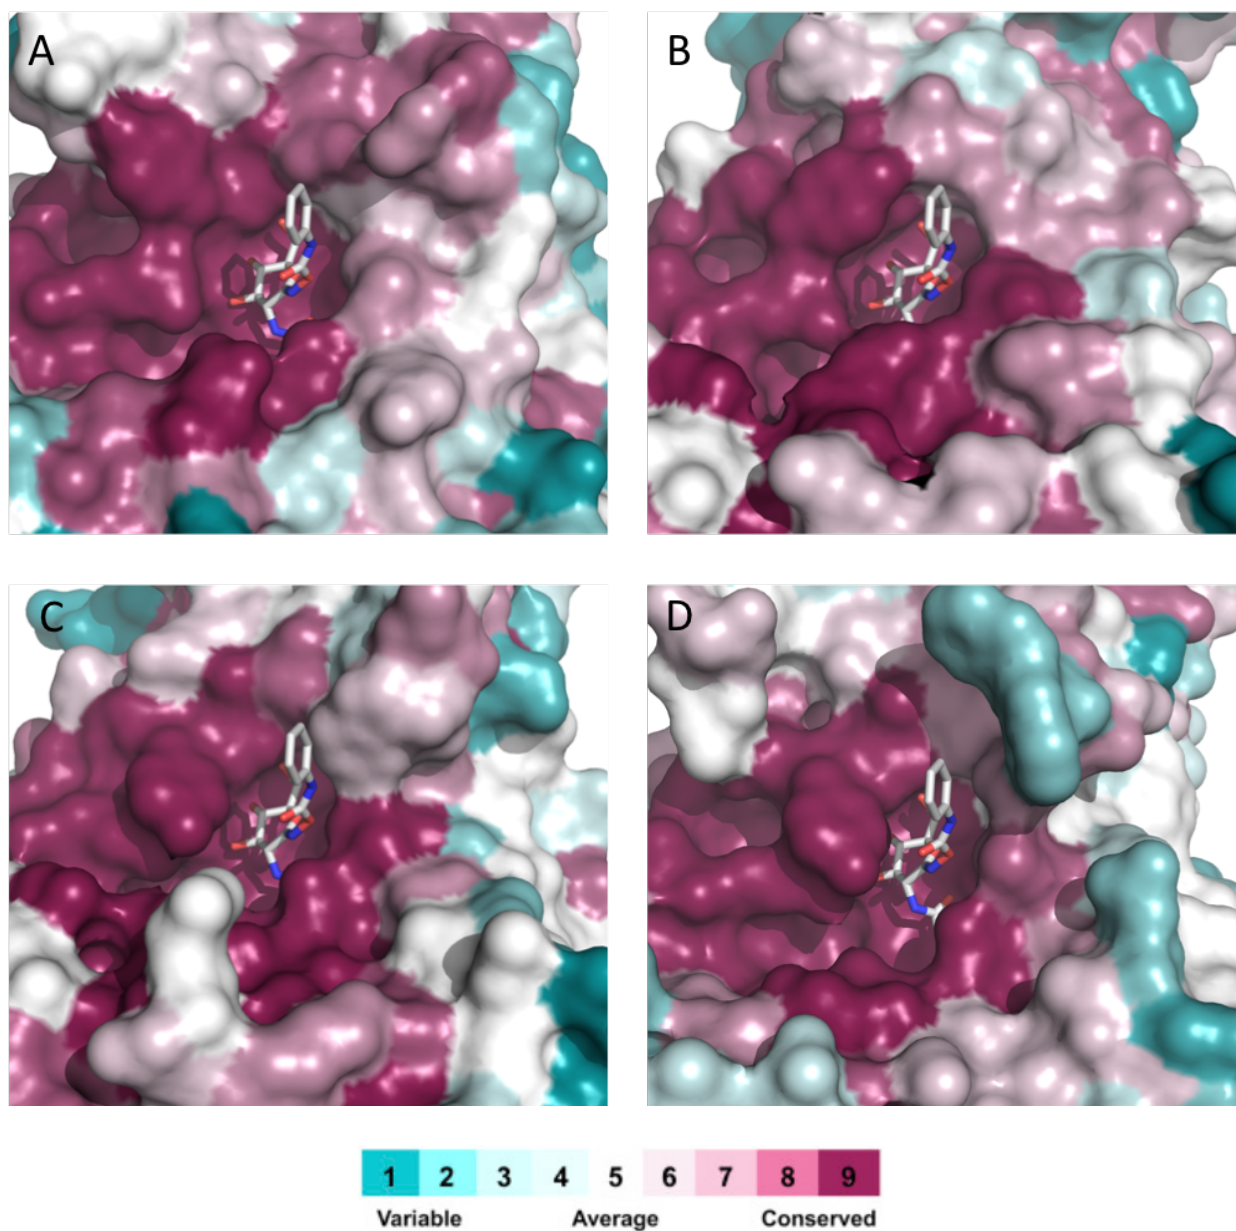

**Figure S3:** Surface representation of *CpGH84* catalytic sites. *CpGH84A* (A), *CpGH84B* (B), *CpGH84C* (C) and *CpGH84D* (D) catalytic sites are colored based on residue conservation using Consurf (Ashkenazy, H., Abadi, S., *et al.* 2016). All apo structures listed above were aligned with PugNac (in grey sticks) from the *CpGH84C* complex (PDB code 2CBJ).

## References

- Ashkenazy H, Abadi S, Martz E, Chay O, Mayrose I, Pupko T, Ben-Tal N. 2016. ConSurf 2016: an improved methodology to estimate and visualize evolutionary conservation in macromolecules. *Nucleic Acids Res*, 44:W344-350.
- Robert X, Gouet P. 2014. Deciphering key features in protein structures with the new ENDscript server. *Nucleic Acids Res*, 42:W320-324.
